# Supplementary material for: A New Labdane-Type Diterpene, 6-O-Acetyl-(12R)-epiblumdane, from Stevia rebaudiana Leaves with Insulin Secretion Effect
Source: MDPI journal article supplement (doi:10.3390/biomedicines10040839), 2022-04-03
Supplement: s1 [file s1]

## Supplementary Materials

# A New Labdane-type Diterpene, 6-*O*-Acetyl-(12*R*)-epiblumdane from *Stevia rebaudiana* Leaves with Insulin Secretion Effect

Heesun Kang <sup>1,†</sup>, Dahae Lee <sup>2,†</sup>, Ki Sung Kang <sup>2,\*</sup> and Ki Hyun Kim <sup>1,\*</sup>

<sup>1</sup> School of Pharmacy, Sungkyunkwan University, Suwon 16419, Korea; hskang428@skku.edu (H.K.)

<sup>2</sup> College of Korean Medicine, Gachon University, Seongnam 13120, Korea; pjsldh@gachon.ac.kr (D.L.)

<sup>†</sup> These authors contributed equally to this work

<sup>\*</sup> Correspondence: kkang@gachon.ac.kr (K.S.K.); khkim83@skku.edu (K.H.K.); Tel.: +82-31-750-5402 (K.S.K.); +82-31-290-7700 (K.H.K.)

**Figure S1** : HR-ESI-MS of compound **1**

**Figure S2** : UV spectrum of compound **1**

**Figure S3** : <sup>1</sup>H NMR spectrum of compound **1**

**Figure S4** : <sup>1</sup>H–<sup>1</sup>H COSY spectrum of compound **1**

**Figure S5** : HSQC spectrum of compound **1**

**Figure S6** : HMBC spectrum of compound **1**

**Figure S7** : NOESY spectrum of compound **1**

**Figure S8** : DP4+ probability analysis of compound **1** using an Excel sheet

**NMR and physical data of the isolated compounds 2-10**

**General experimental procedures**

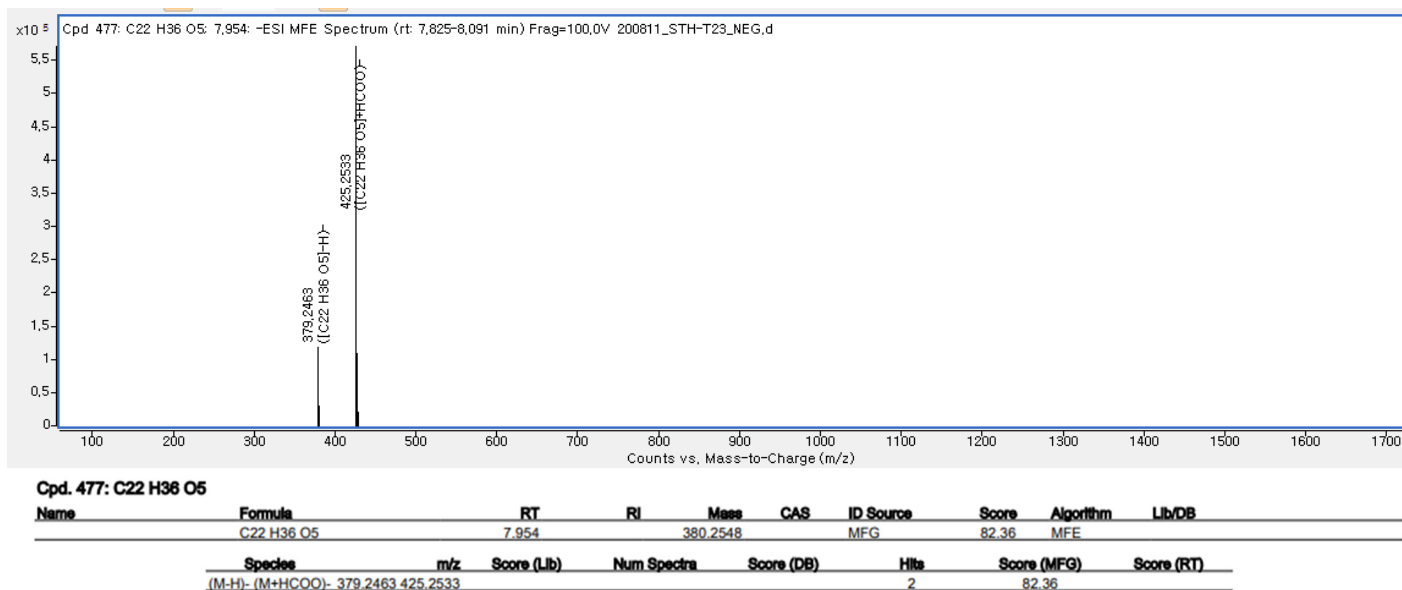

Figure S1 : HR-ESI-MS of compound 1

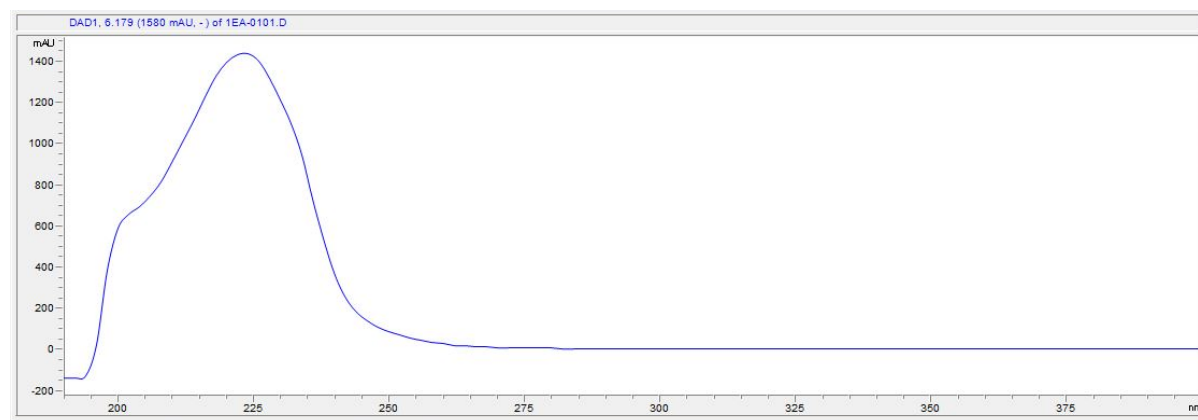

Figure S2 : UV spectrum of compound 1

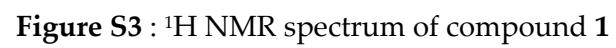

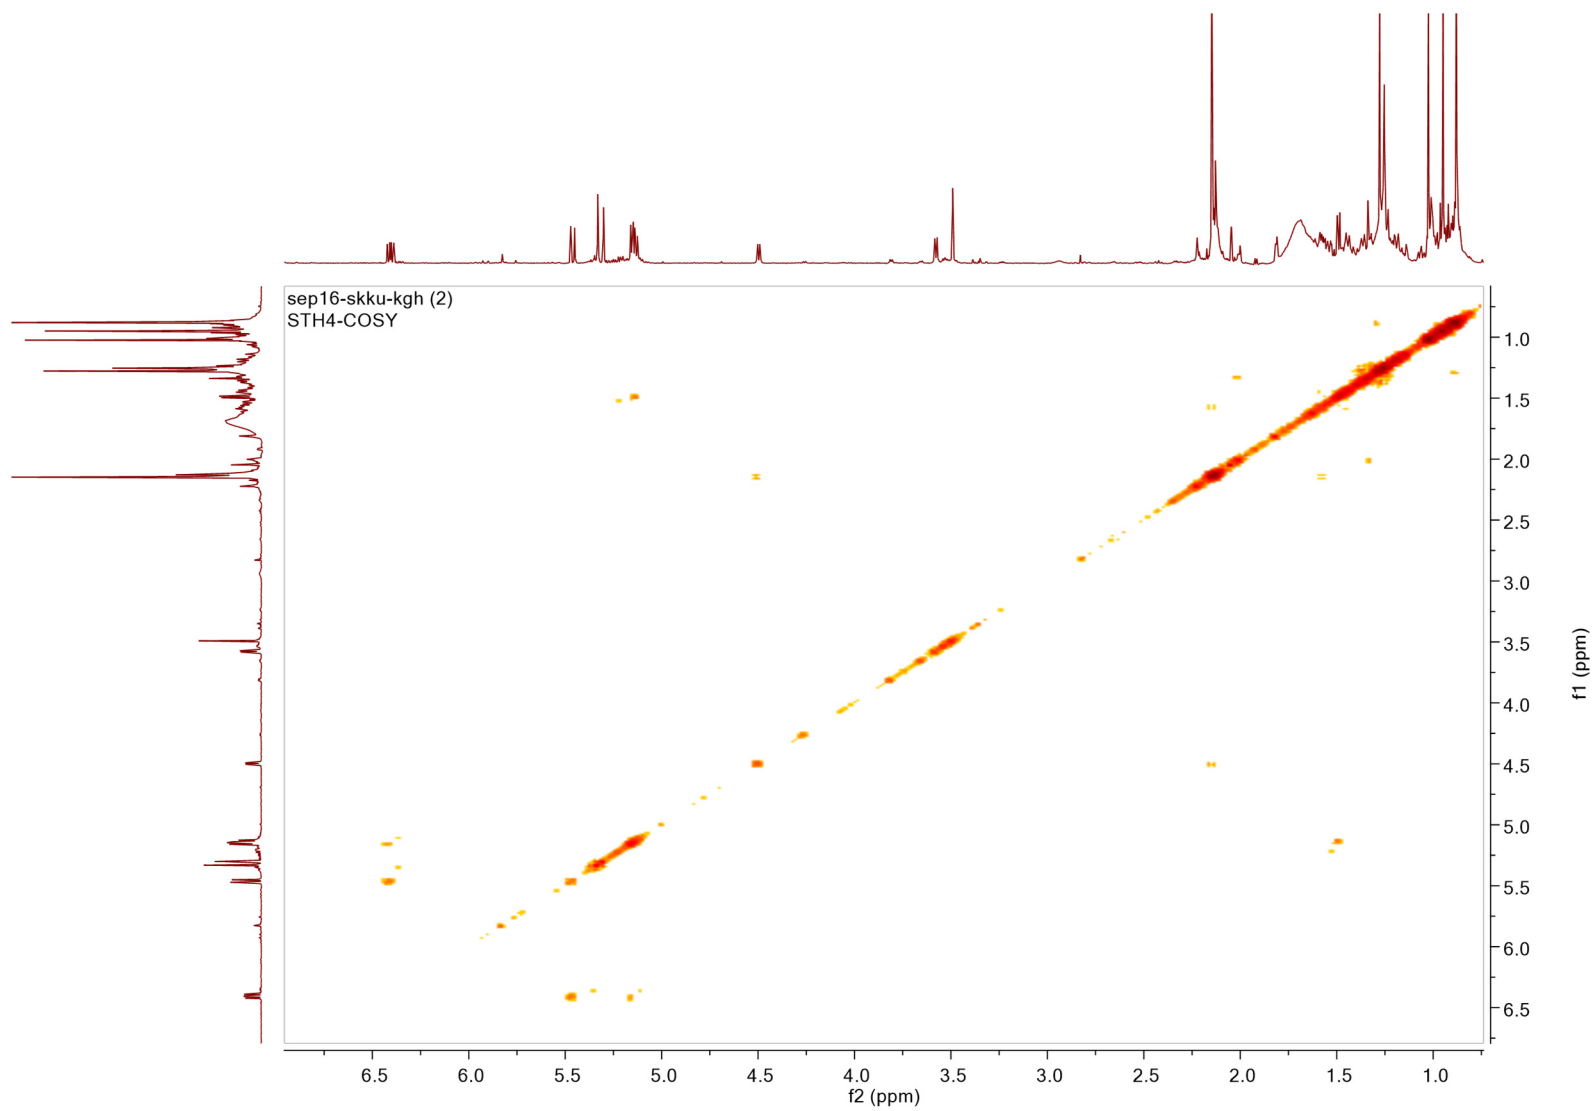

**Figure S4 :**  $^1\text{H}$ – $^1\text{H}$  COSY spectrum of compound **1**

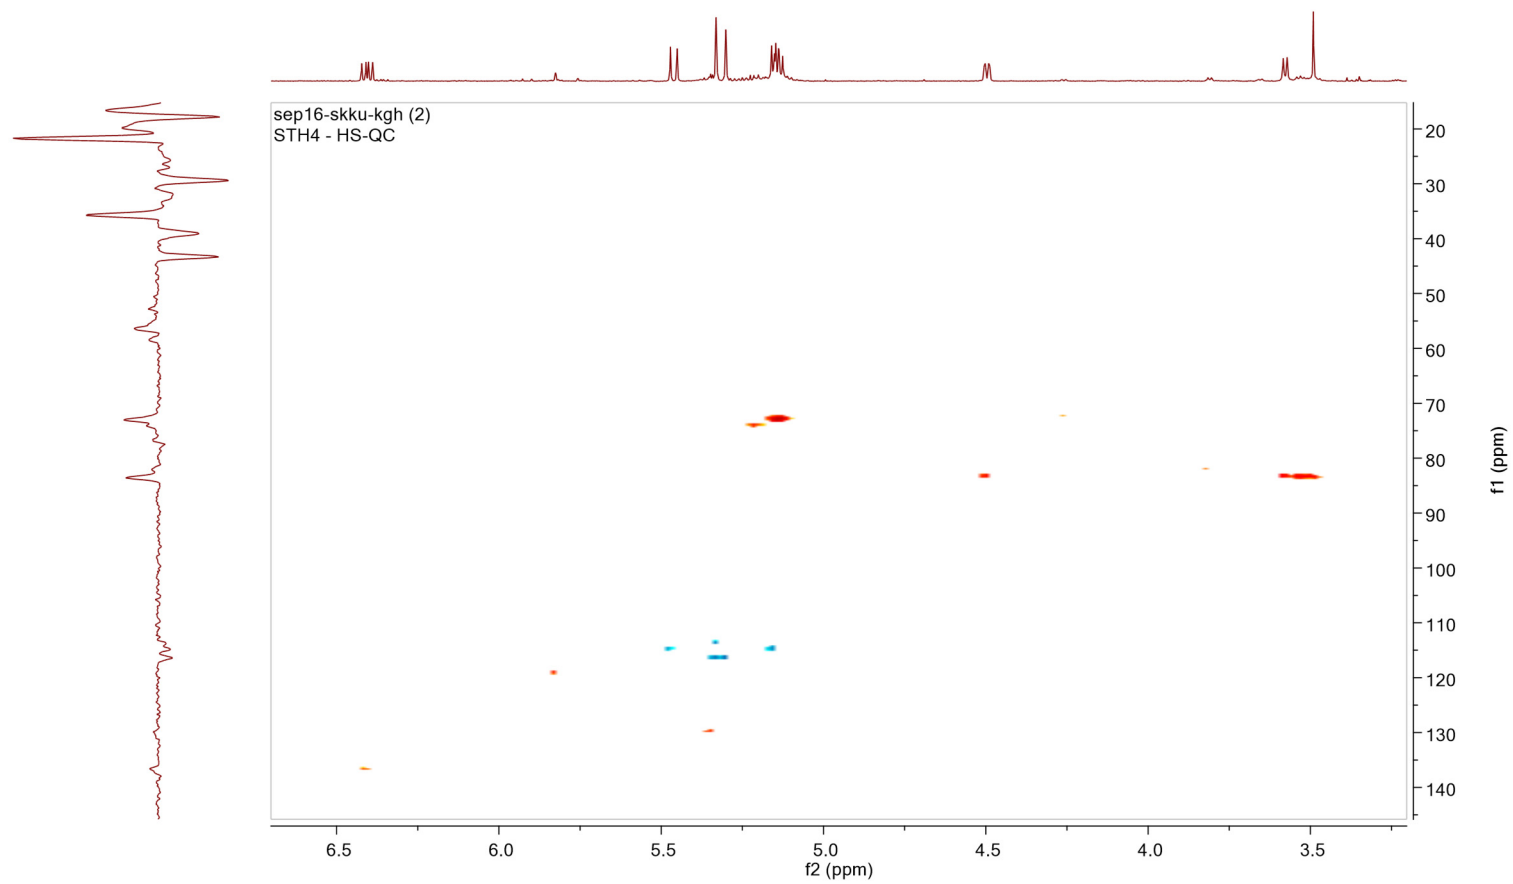

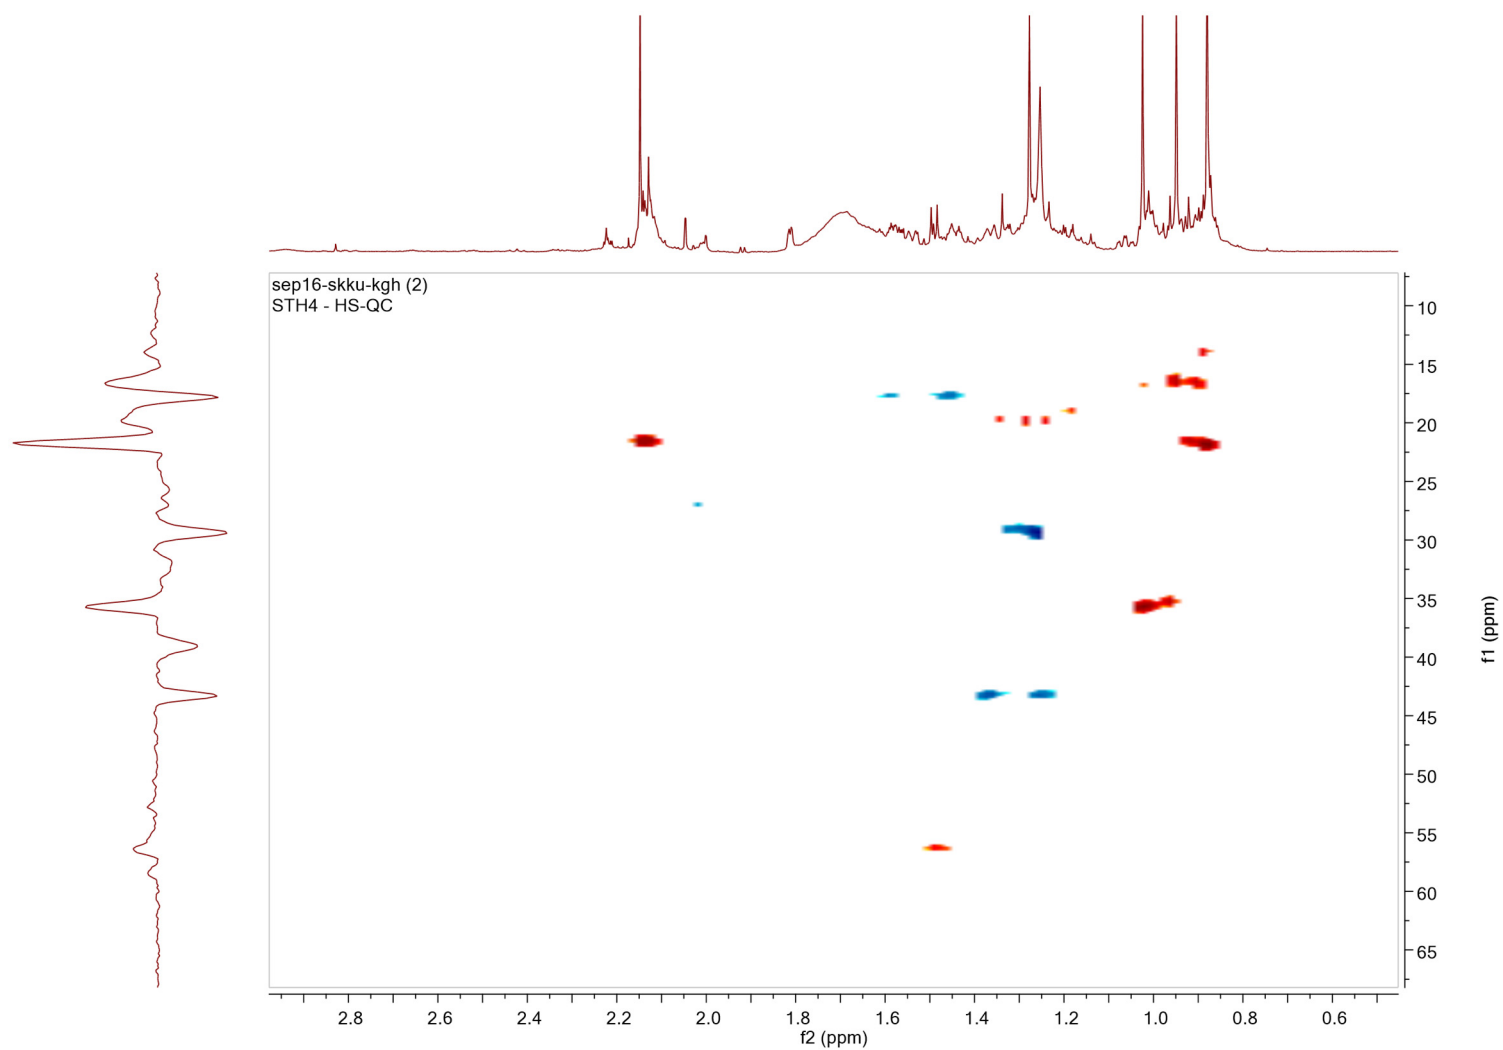

**Figure S5** : HSQC spectrum of compound **1**

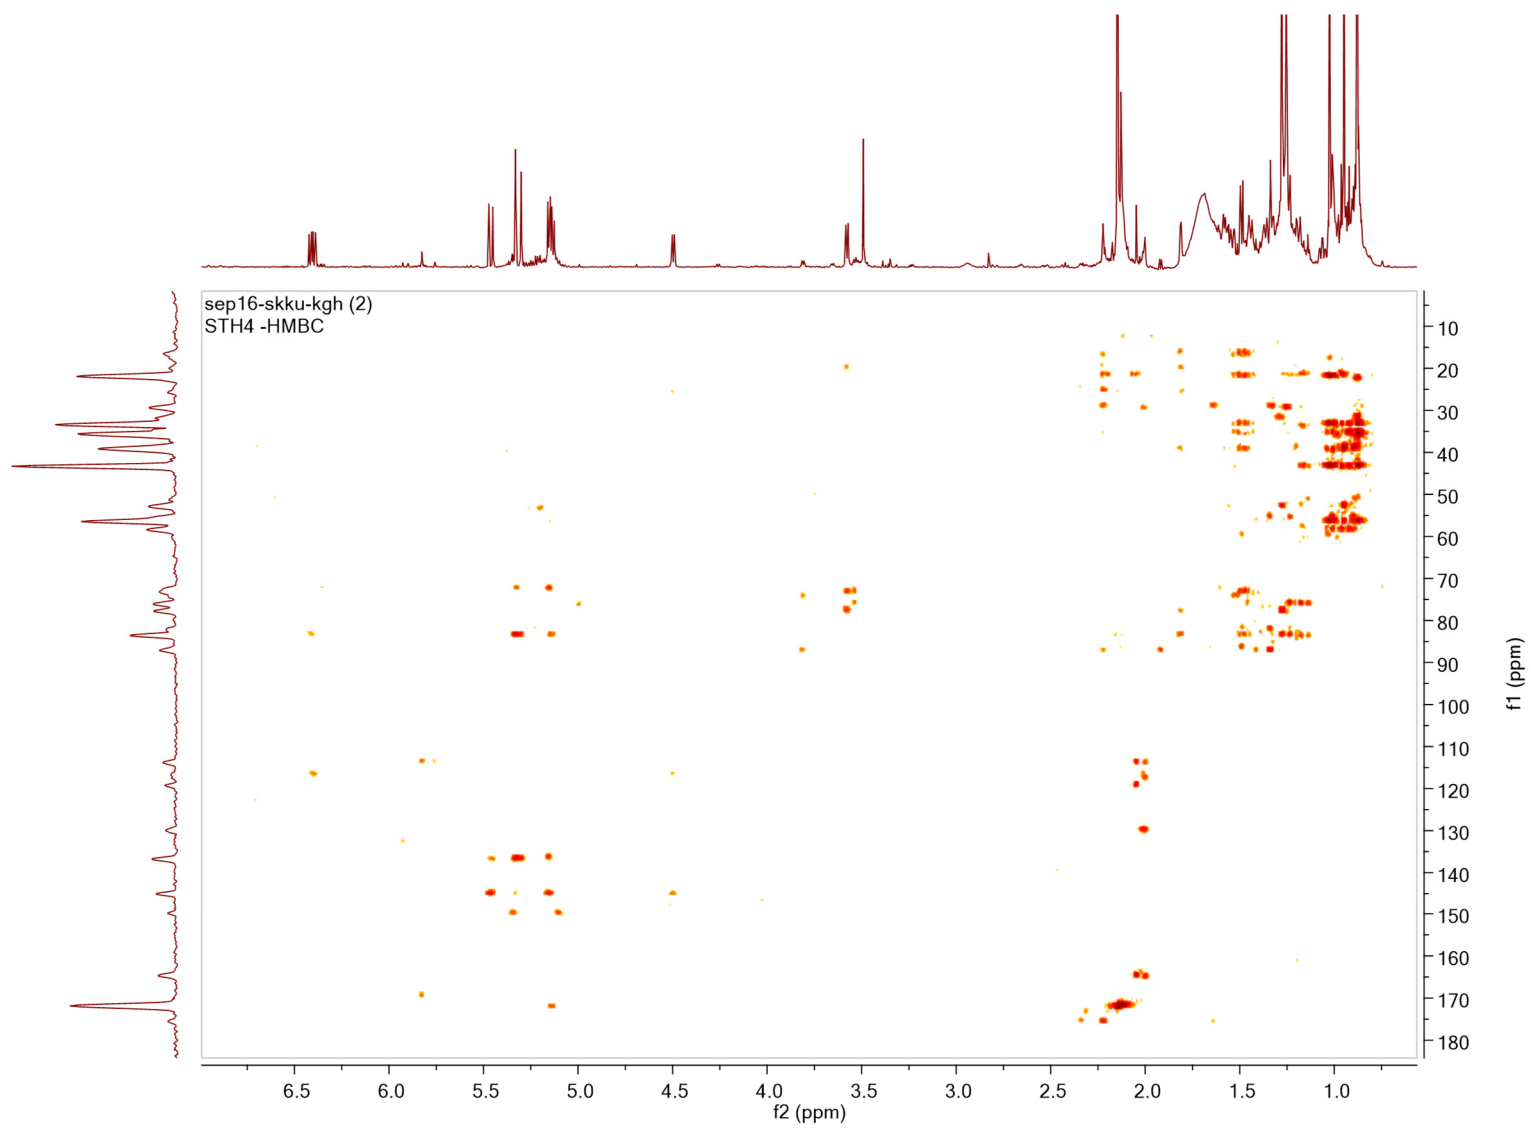

**Figure S6 : HMBC spectrum of compound 1**

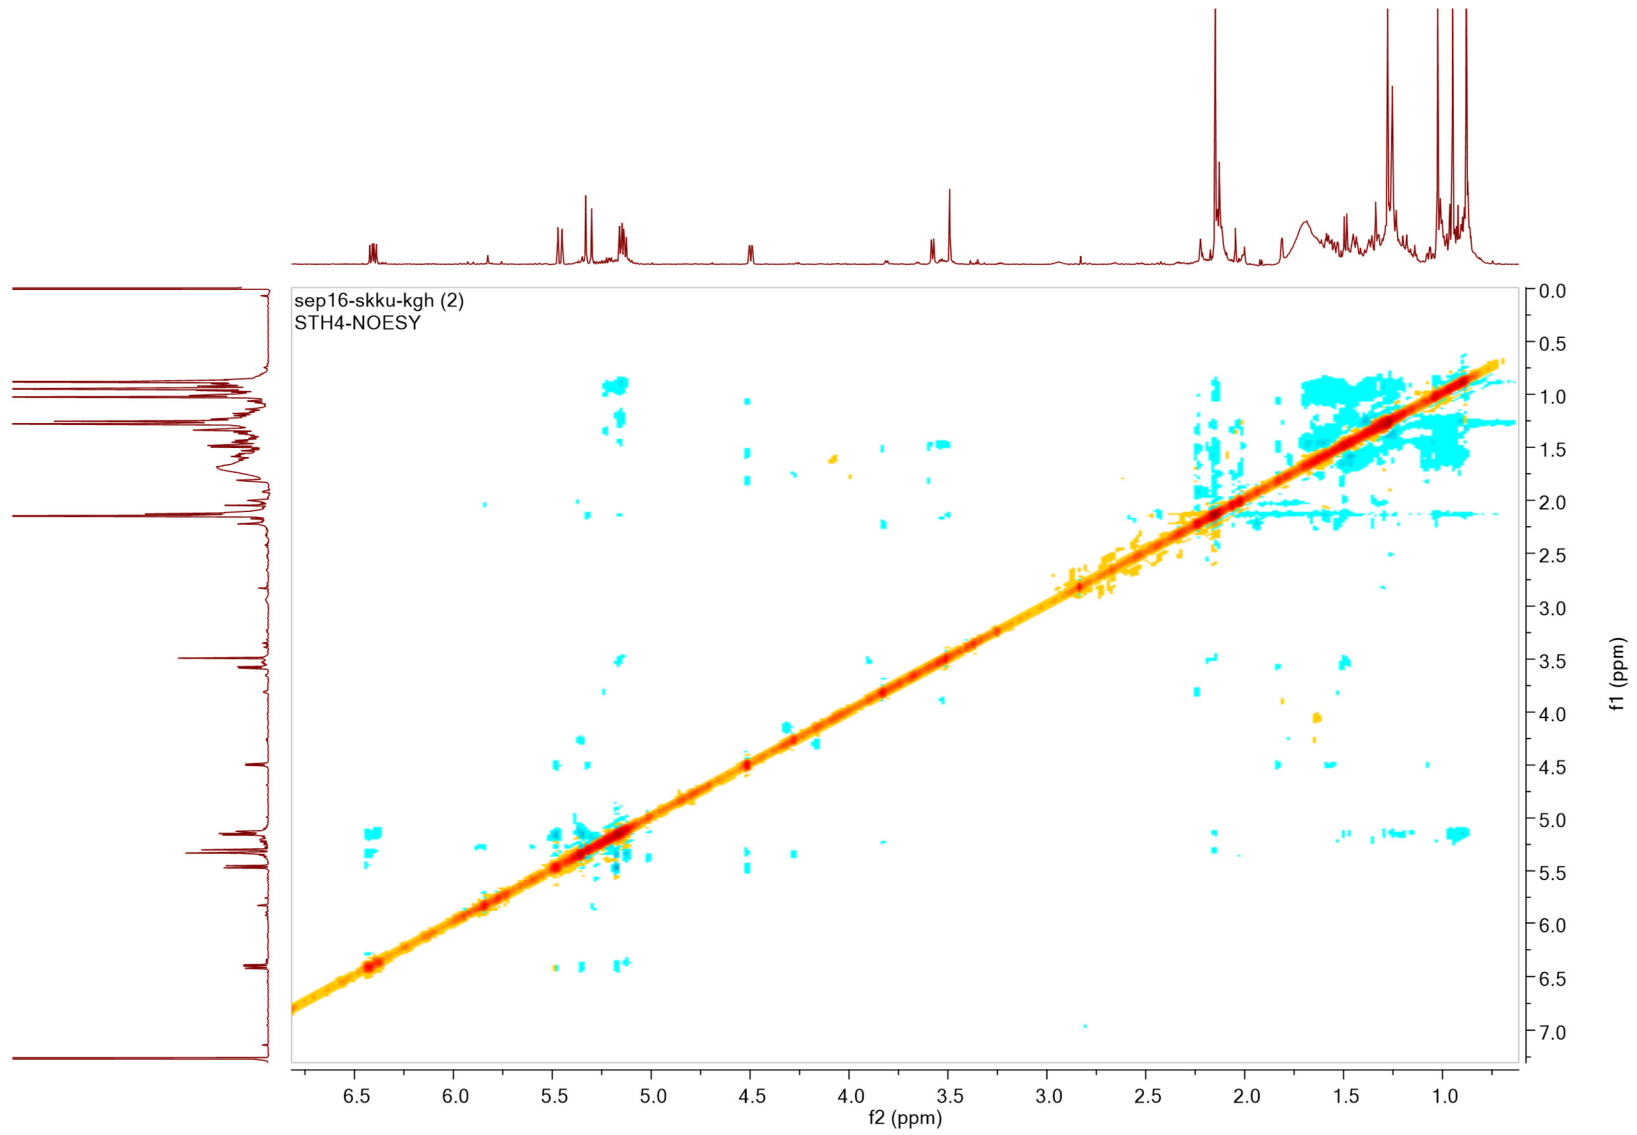

**Figure S7** : NOESY spectrum of compound **1**



| Functional       | Solvent?                                                                                 |                                                                                          | Basis Set  |          | Type of Data    |          |
|------------------|------------------------------------------------------------------------------------------|------------------------------------------------------------------------------------------|------------|----------|-----------------|----------|
| B3LYP            | PCM                                                                                      |                                                                                          | 6-31G(d,p) |          | Unscaled Shifts |          |
|                  | Isomer 1                                                                                 | Isomer 2                                                                                 | Isomer 3   | Isomer 4 | Isomer 5        | Isomer 6 |
| sDP4+ (H data)   |  1.09%  |  98.91% | -          | -        | -               | -        |
| sDP4+ (C data)   |  99.14% |  0.86%  | -          | -        | -               | -        |
| sDP4+ (all data) |  55.98% |  44.02% | -          | -        | -               | -        |
| uDP4+ (H data)   |  98.21% |  1.79%  | -          | -        | -               | -        |
| uDP4+ (C data)   |  64.14% |  35.86% | -          | -        | -               | -        |
| uDP4+ (all data) |  98.99% |  1.01%  | -          | -        | -               | -        |
| DP4+ (H data)    |  37.76% |  62.24% | -          | -        | -               | -        |
| DP4+ (C data)    |  99.52% |  0.48%  | -          | -        | -               | -        |
| DP4+ (all data)  |  99.20% |  0.80%  | -          | -        | -               | -        |

Figure S8 : DP4+ probability analysis of compound **1** using an Excel sheet

## NMR and physical data of the isolated compounds 2-10

### 1. Austroinlin (2)

White crystals;  $^1\text{H}$  NMR (850 MHz,  $\text{CDCl}_3$ ):  $\delta$  0.91 (3H, s, H-18), 1.00 (3H, s, H-20), 1.17 (3H, s, H-17), 1.18 (3H, s, H-19), 1.11–1.51 (6H, m, H-1,2,3,5,9), 1.79 (3H, s, H-16), 2.22 (1H, m, H-11a), 2.46 (1H, m, H-11b), 3.38 (1H, t,  $J$  = 9.3 Hz, H-7), 3.62 (1H, t,  $J$  = 10.1 Hz, H-6), 5.11 (1H, d,  $J$  = 10.8 Hz, H-15), 5.21 (1H, d,  $J$  = 17.2 Hz, H-15), 5.44 (1H, t,  $J$  = 6.9 Hz, H-12), 6.86 (1H, dd,  $J$  = 17.2 and 10.8 Hz, H-14); ESI-MS  $m/z$  345.3  $[\text{M}+\text{Na}]^+$ .

### 2. 6-O-Acetylaustroinulin (3)

White crystals;  $^1\text{H}$  NMR (850 MHz,  $\text{CDCl}_3$ ):  $\delta$  0.88 (3H, s, H-18), 0.96 (3H, s, H-20), 1.01 (3H, s, H-19), 1.23 (3H, s, H-17), 1.79 (3H, s, H-16), 2.13 (3H, s, H-22), 2.23 (1H, dd,  $J$  = 15.3 and 7.0, H-11a), 2.48 (1H, d,  $J$  = 15.7 Hz, H-11b), 3.47 (1H, d,  $J$  = 10.0 Hz, H-7), 5.11 (1H, d,  $J$  = 10.7 Hz, H-6), 5.13 (1H, d,  $J$  = 10.6 Hz, H-15), 5.20 (1H, d,  $J$  = 17.2 Hz, H-15), 5.44 (1H, t,  $J$  = 6.8 Hz, H-12), 6.87 (1H, dd,  $J$  = 17.2 and 10.8 Hz, H-14); ESI-MS  $m/z$  387.3  $[\text{M}+\text{Na}]^+$ .

### 3. Sterebin A (4)

Colorless powder;  $^1\text{H}$  NMR (850 MHz,  $\text{CDCl}_3$ ):  $\delta$  1.04 (3H, s, H-17), 1.07 (3H, s, H-18), 1.18 (3H, s, H-16), 1.26 (3H, s, H-15), 2.02 (1H, d,  $J$  = 10.4 Hz, H-9), 2.28 (3H, s, H-14), 3.44 (1H, d,  $J$  = 9.4 Hz, H-7), 3.74 (1H, dd,  $J$  = 10.7 and 9.7 Hz, H-6), 6.22 (1H, d,  $J$  = 15.5 Hz, H-12), 6.81 (1H, dd,  $J$  = 15.5, 10.4 Hz, H-11); ESI-MS  $m/z$  333.2  $[\text{M}+\text{Na}]^+$ .

### 4. Sterebin B (5)

Colorless powder;  $^1\text{H}$  NMR (850 MHz,  $\text{CDCl}_3$ ):  $\delta$  0.91 (3H, s, H-17), 1.03 (3H, s, H-18), 1.12 (3H, s, H-16), 1.31 (3H, s, H-15), 1.44 (1H, d,  $J$  = 11.0 Hz, ) 2.04 (1H, d,  $J$  = 10.3 Hz, H-9), 2.14 (3H, s, H-14), 2.28 (3H, s, H-2'), 3.53 (1H, d,  $J$  = 9.9 Hz, H-7), 5.22 (1H, dd,  $J$  = 11.3, 10.0 Hz, H-6), 6.23 (1H, d,  $J$  = 15.5 Hz, H-12), 6.80 (1H, dd,  $J$  = 15.5, 10.3 Hz, H-11); ESI-MS  $m/z$  375.2  $[\text{M}+\text{Na}]^+$ .

### 5. Sterebin E (6)

Colorless powder;  $^1\text{H}$  NMR (850 MHz,  $\text{CDCl}_3$ ):  $\delta$  1.01 (3H, s, H-18), 1.03 (3H, s, H-19), 1.18 (3H, s, H-20), 1.21 (3H, s, H-17), 1.83 (3H, s, H-16), 1.88 (1H, d,  $J$  = 10.1 Hz, H-9), 3.46 (1H, d,  $J$  = 9.4 Hz, H-7), 3.74 (1H, t,  $J$  = 10.1 Hz, H-6), 4.29 (2H, d,  $J$  = 6.8 Hz, H-15), 5.65 (1H, t,  $J$  = 7.6 Hz, H-11), 5.66 (1H, dd,  $J$  = 16.0, 10.0 Hz, H-14), 6.19 (1H, d,  $J$  = 15.4 Hz, H-12); ESI-MS  $m/z$  361.2  $[\text{M}+\text{Na}]^+$ .

### 6. (+)-Epiloliolide (7)

Colorless gum;  $^1\text{H}$  NMR (850 MHz,  $\text{CDCl}_3$ ):  $\delta$  1.28 (3H, s, H-10), 1.31 (3H, s, H-9), 1.34 (1H, dd,  $J$  = 12.0 Hz, H-8), 1.51 (1H, t,  $J$  = 11.8, H-7), 1.59 (3H, s, H-8), 2.04 (1H, ddd,  $J$  = 12.8, 4.2, and 2.2 Hz, H-5), 2.54 (ddd,  $J$  = 11.8, 3.9, and 2.3 Hz, H-7), 4.13 (1H, t,  $J$  = 10.2 Hz, H-6), 5.72 (1H, s, H-3); ESI-MS  $m/z$  197.1  $[\text{M}+\text{H}]^+$ .

7. (-)-Loliolide (**8**)

Colorless oil;  $^1\text{H}$  NMR (850 MHz,  $\text{CDCl}_3$ ): 1.26 (3H, s, H-9), 1.47 (3H, s, H-8), 1.54 (1H, dd,  $J = 14.7, 3.7$  Hz, H-7), 1.77 (1H, m, H-5), 1.78 (3H, s, H-10), 1.97 (1H, dt,  $J = 14.5, 2.6$  Hz, H-7), 2.46 (1H, dt,  $J = 14.1$  and  $2.6$  Hz, H-5), 4.34 (1H, d,  $J = 2.5$  Hz, H-6), 5.70 (1H, s, H-3); ESI-MS  $m/z$ : .197.1  $[\text{M}+\text{H}]^+$ .

8. Lupeol (**9**)

White powder;  $^1\text{H}$  NMR (850 MHz,  $\text{CDCl}_3$ ):  $\delta$  0.76, 0.79, 0.83, 0.94, 0.97, 1.03, and 1.68 (each 3H, s, H-23, H-24, H-25, H-26, H-27, H-28, and H-30), 2.38 (1H, td,  $J = 11.1, 5.9$  Hz, H-19), 3.19 (1H, dd,  $J = 11.7, 4.6$  Hz, H-3), 4.57 (1H, s, H-29b), 4.69 (1H, d,  $J = 2.2$ , H-29a); ESIMS  $m/z$ : 449.3  $[\text{M} + \text{Na}]^+$ .

9. Phytol (**10**)

Colorless oil;  $^1\text{H}$  NMR (850 MHz,  $\text{CDCl}_3$ ):  $\delta$  0.84 (3H, d,  $J = 6.3$  Hz, H-19), 0.85 (3H, d,  $J = 6.2$  Hz, H-18), 0.86 (3H, d,  $J = 1.4$ , H-17), 0.87 (3H, d,  $J = 1.4$ , H-16), 1.52 (1H, dt,  $J = 13.3$  and  $6.7$ , H-15), 1.67 (3H, s, H-20), 4.15 (2H, d,  $J = 6.9$  Hz, H-1), 5.41 (1H, tdd,  $J = 6.9, 2.4, 1.2$  Hz, H-2); ESIMS  $m/z$ : 319.3  $[\text{M} + \text{Na}]^+$ .

### *General experimental procedures*

Optical rotation was measured using a Jasco P-2000 polarimeter (Jasco, Easton, MD, USA). ECD spectra were obtained using a Jasco J-1500 spectropolarimeter (Jasco). Ultraviolet (UV) spectra were acquired using an Agilent 8453 UV-visible spectrophotometer (Agilent Technologies, Santa Clara, CA, USA). NMR spectra were recorded using a Bruker AVANCE III HD 850 NMR spectrometer with a 5 mm TCI CryoProbe operating at 850 MHz ( $^1\text{H}$ ) and 212.5 MHz ( $^{13}\text{C}$ ), with chemical shifts given in ppm ( $\delta$ ) for  $^1\text{H}$  and  $^{13}\text{C}$  NMR analyses. Preparative and semi-preparative high-performance liquid chromatography (HPLC) was performed using a Waters 1525 Binary HPLC pump with a Waters 996 photodiode array detector (Waters Corporation, Milford, MA, USA) using an Agilent Eclipse C18 column (250  $\times$  21.2 mm, 5  $\mu\text{m}$ ; flow rate: 5 mL/min; Agilent Technologies) and a Phenomenex Luna Phenyl-hexyl 100 Å column (250  $\times$  10 mm, 5  $\mu\text{m}$ ; flow rate: 2 mL/min; Phenomenex, Torrance, CA, USA). Liquid chromatography/mass spectrometry (LC/MS) analysis was performed on an Agilent 1200 Series HPLC system equipped with a diode array detector and 6130 Series ESI mass spectrometer using an analytical Kinetex C<sub>18</sub> 100 Å column (100  $\times$  2.1 mm, 5  $\mu\text{m}$ ; flow rate: 0.3 mL/min; Phenomenex). All high resolution electrospray ionization mass spectrometry (HR-ESI-MS) data were obtained using an Agilent G6545B quadrupole time-of-flight mass spectrometer (Agilent Technologies) with an Agilent EclipsePlus C<sub>18</sub> column (2.1 mm  $\times$  50 mm i.d., 1.8  $\mu\text{m}$ ; flow rate: 0.3 mL/min) maintained at 25 °C. Silica gel 60 (230–400 mesh; Merck, Darmstadt, Germany) and RP-C<sub>18</sub> silica gel (230–400 mesh; Merck) were used for column chromatography. Molecular sieve column chromatography was performed using a Sephadex LH-20 (Pharmacia, Uppsala, Sweden). Thin-layer chromatography was performed using precoated silica gel F<sub>254</sub> plates and RP-C<sub>18</sub> F<sub>254s</sub> plates (Merck), and the spots were detected under UV light or by heating after spraying with anisaldehyde-sulfuric acid. The three-dimensional molecular modeling was performed using ChemBioDraw Ultra and Avogadro.
